# Supplementary material for: Effect of a Brief Video Intervention on Incident Infection among Patients Attending Sexually Transmitted Disease Clinics
Source: PLOS journal article supplement (doi:10.1371/journal.pmed.0050135), 2008-06-19
Supplement: S1 (10.1371/journal.pmed.0050135.s001) [file journal.pmed.0050135.s001]

# PROTOCOL

Effectiveness of a Video-based Educational Intervention to Prevent

Human Immunodeficiency Virus (HIV) and Sexually Transmitted Diseases (STDs)

Among Patients Attending STD Clinics

##### Centers for Disease Control and Prevention (CDC)

Andrew Margolis

Lee Warner

Gale R. Burstein

Ann O’Leary

David Purcell

Thomas Peterman

##### Denver

Cornelis A. Rietmeijer

John M. Douglas, Jr.

Sheana Bull

Doug Richardson

Mark Foster

**Long Beach**

*Education Development Center, Inc. (EDC)*

Lydia O’Donnell

Alexi San Doval

Athi Myint-U

Richard Duran

Carl O’Donnell

Kevin Malotte (UCLB)

Nettie DeAugustine (LBDOH)

##### San Francisco

Jeffrey D. Klausner

Gregory L. Greenwood

Carolyn Hunt

February 20, 2004

Contact information:

Centers for Disease Control and Prevention

Division of HIV/AIDS Prevention

Prevention Research Branch

1600 Clifton Road, NE Mail Stop E-37

Atlanta, GA 30333

404-639-1900; 404-639-8640 (fax)

Principal Investigator: Lee Warner, MPH

404-639-2089; dlw7@cdc.gov

Denver Public Health

605 Bannock, MC 2600

Denver, CO 80204

303-436-7363; 303-436-3117 (fax)

Principal Investigator: Cornelis A. Rietmeijer, MD, MSPH

kees.rietmeijer@dhha.org

Educational Development Center, Inc.
55 Chapel Street
Newton, MA
617-969-7100 ext. 2368; 617-969-3995 (fax)
Principal Investigator: Lydia O’Donnell, Ed.D. lodonnell@edc.org Principal Investigator: Kevin Malotte, DrPH
California State University, Long Beach
5500 Atherton St, Suite 400
Long Beach, CA
562-985-2177; 562-985-2180 (fax [kmalotte@csulb.edu](mailto:kmalotte@csulb.edu)

San Francisco Department of Public Health

STD Prevention and Control Services

1360 Mission Street, Suite #401

San Francisco, CA 94103

415-554-8450; 415-554-8488 (fax)

Principal Investigator: Jeff Klausner, MD, MPH

jeff.klausner@sfdph.org

Table of Contents

Abstract 4

List of Abbreviations 4

1 Project Description 5

1.1 Overview …….. 5

1.2 Justification and Background 6

1.3 Locales 7

1.4 Number of Subjects 7

2 INVESTIGATORS 7

3 METHODS AND MATERIALS 8

3.1 Study design 8

3.2 Data collection methods 9

3.3 Sample size 9

3.4 Data handling and analysis 10

3.5 Plans for reporting results 12

3.6 Clinical procedures 13

3.7 Analytic techniques 13

3.8 FDA IND information 13

3.9 Description of intervention and control conditions 13

4 PARTICIPANTS 14

4.1 Selection procedures 14

4.2 Vulnerable populations 14

4.3 Emergency care procedures 14

4.4 Handling and reporting of adverse events 14

4.5 Procedures for notifying participants of their results 14

5 RISK/BENEFIT INFORMATION 14

5.1 Description of risks and methods to minimize risks in this study 14

5.2 Direct benefits to participants associated with this study 15

5.3 Description of the potential risk to anticipated benefit ratio: 15

6 INFORMED CONSENT 15

7 RECORDS MANAGEMENT 18

REFERENCES 19

APPENDICES 20

## Abstract

This intervention trial will assess the effectiveness of a brief 20-minute video-based educational waiting room intervention to reduce incident STD among male and female patients attending STD clinics in Denver, San Francisco, and Long Beach.

Investigators will randomly assign blocks of clinic weeks to either the brief waiting room intervention condition (20-minute educational video and health promotional materials, i.e., posters) or a comparison waiting room condition (standard clinic services). Through a review of existing medical records and STD surveillance registry data, we will determine and compare the incidence of new STDs over a 12-month period (on average) by assigned waiting room conditions.

## List of Abbreviations

**AIDS:** *Acquired immunodeficiency syndrome*

**CDC:** *Centers for Disease Control and Prevention*

**DHAP:** *Division of HIV and AIDS Prevention –*

**HIV:** *Human immunodeficiency virus*

**IRB:** *Institutional Review Board*

**NCHSTP:** *National Center for HIV, STD, and TB Prevention*

**STD:** *Sexually transmitted disease*

**Effectiveness of a Video-based Educational Intervention to Prevent**

**Human Immunodeficiency Virus (HIV) and Sexually Transmitted Diseases (STDs) Among Patients Attending STD Clinics**

## 1. Project Description

**1.1 Overview**

The purpose of this study is to evaluate an HIV/STD prevention intervention designed for STD clinic clients. The primary goal of this study is to assess whether a brief 20-minute video-based educational waiting room intervention can reduce STD incidence among male and female patients attending STD clinics, when compared with patients who receive current standard clinic services.

Formative research activities have been ongoing for this study since 2002. In April 2002, the CDC IRB reviewed and exempted a protocol to conduct formative research. The original protocol called for the conduct of focus groups with STD clinic participants in all 3 sites to inform the content and format of the educational video-based intervention (CDC IRB protocol # 3500). Amendments to this protocol for conducting further formative research were approved by the CDC IRB in June 2002 (to conduct focus groups in non-clinic settings (New York site only)) and in January 2003 (to determine how best to administer the intervention condition in the waiting room (all 3 sites)). The annual continuation for this protocol was approved by the CDC IRB on April 15, 2003.

Piloting activities are nearing completion for this study, and the project is moving toward implementation and evaluation of the intervention. This modification to our pilot protocol describes an intervention trial to assess changes in STD incidence as a result of exposure to the educational video-based intervention. Investigators will randomly assign blocks of clinic weeks to either the brief waiting room intervention condition (20-minute educational video and health promotional materials, i.e., posters) or a comparison waiting room condition (standard clinic services). Through a review of existing medical records and STD surveillance registry data, we will determine and compare the incidence of new STDs over a 12-month period (on average) by assigned waiting room conditions.

**1.2 Justification and Background**

With approximately 15 million incident cases of sexually transmitted diseases (STDs) occurring annually, including 40,000 human immunodeficiency virus (HIV), primary prevention of HIV/STDs among persons who have chosen to be sexually active remains a high public health priority (Cates 1999). Although a number of effective interventions to prevent HIV/STDs have been developed, these have generally focused on individual risk reduction and involved multiple sessions and thus have been fairly resource intensive to implement. There has been increased emphasis on the need for briefer interventions that can reduce both STD and high-risk sexual behavior, with the assumption that such interventions, if proven effective, would be more likely to be accepted by patients and adopted by clinics. For example, individualized client-centered counseling interventions associated with HIV testing with as few as two 20-minute sessions (e.g., Project RESPECT) have been shown to increase condom use and reduce incident STD by 20 to 30 percent in randomized clinical trials of STD clinic attendees (Kamb 1998). Although such interventions may be cost-effective for HIV/STD prevention and are considered brief by comparison with other approaches, routine implementation of even these “brief” counseling interventions still poses challenges for high volume STD clinic settings (e.g., because of lack of clinic resources, interruptions of clinic flow, insufficient time with individual patients). Thus, simple practical interventions that can reduce transmission or acquisition of HIV/STDs among STD clinic patients and that are both easy to implement and likely to be sustained are urgently needed.

A growing body of research has focused on the use of brief educational video-based interventions for reducing risk behaviors related to HIV/STD among STD clinic patients. Although such low intensity video-based interventions may have smaller effect sizes, limited research suggests that such interventions (when paired with group counseling) can be inexpensively implemented in STD clinics within a single session and can result in moderate reductions in both high-risk sexual behavior and STD outcomes (see O’Donnell 1995, O’Donnell 1998; Cohen 1991, 1992a, 1992b). From a practical standpoint, there are still barriers to the adoption of such interventions because of the staff time required for convening group counseling sessions and the need to convene a large enough group of STD clinic participants to administer the intervention. From a research standpoint, these studies collectively suggest that a video-only approach might reduce incident HIV/STD in a clinic population. Previous studies have been limited by a number of factors, however, including the use of controlled research settings rather than the actual waiting room for administering the intervention (O’Donnell 1995, 1998), the use of videos tailored to specific self-selected target groups (e.g., males and/or certain racial/ethnic groups) in contrast to the entire STD clinic population (O’Donnell 1995, 1998), the use of single study sites (O’Donnell 1995, 1998; Cohen 1991, 1992a, 1992b), and the inclusion of group-based counseling as a component of the intervention (O’Donnell 1995, 1998; Cohen 1991, 1992a, 1992b).

To our knowledge, no study has assessed whether a brief, video-based intervention implemented in real-world setting without individual or group counseling can reduce HIV/STD incidence among STD clinic attendees. The proposed study will assess the utility of a brief video-based waiting room intervention that can be used with groups of patients in STD clinic settings. This intervention, as designed, would be feasible in high volume clinical settings, complementary to existing HIV/STD prevention activities, less costly/resource intense, and likely sustainable once the research project has ended. If successful, this waiting room intervention will enhance the menu of effective programs that are currently available to the STD clinic population. Previous research indicates that, ideally, a brief video would not impair patient flow, would be acceptable, have the potential to reduce HIV/STD incidence in an STD clinic population, and not excessively utilize use clinic resources. This study will evaluate whether this structural intervention, delivered in the clinic waiting room rather than privately or in a small group research setting, is effective at reducing HIV/STD incidence.

### **1.3 Locales**

This study will be conducted as a multi-site trial in 3 urban STD clinics located in Denver, Colorado (Denver Metro Health Clinic (DMCH)), San Francisco, California (City Clinic), and Long Beach, California (Long Beach Department of Health & Human Services STD Clinic). The Jamaica clinic in the New York site will no longer be participating in the passive intervention trial. This decision was made given a lack of capacity to complete the study in a timely manner. Instead, a third STD clinic located in Long Beach, California has been secured. Project activities in this site will be coordinated through the California State University, Long Beach Foundation, and the California Department of Health and Human Services through a sub-contract with the Education Development Center, Inc (R18/CCU121005).

**1.4 Number of subjects**

No subjects will be actively enrolled for this phase of the study. The study will consist of comparing incident STD rates (obtained through passive surveillance of existing medical records and STD surveillance registry databases) between the two study conditions. It is estimated that at least 27,000 patient records will need to be reviewed to meet minimum sample size requirements. Please see section **3.4 Sample Size** for further discussion.

### **2. Investigators/Collaborators**

#### Under this cooperative agreement, CDC and site investigators are jointly responsible for protocol development, data analysis, and manuscript preparation. Study investigators, as of February 20, 2004 are listed below.

#### CDC:

Andrew Margolis, MPH, Project Officer

Lee Warner, PhD, MPH, Co-Project Officer

David Purcell, PhD, Consultant

Ann O’Leary, PhD, Consultant

Thomas A. Peterman, MD, MSc, Consultant

Jocelyn Patterson, MPH, Study Coordinator

#### Education Development Center, Inc.:

Lydia O’Donnell, EdD, Principal Investigator

Alexi San Doval, MPH, Co-Investigator

Athi Myint-U, Ed.M., Project Coordinator

Richard Duran, MSW, Senior Field Supervisor

Carl O’Donnell, Sc.D., MPH, Senior Methodologist

Kevin Malotte, DrPH, Principal Investigator (Long Beach)

Nettie DeAugustine, Co-Principal Investigator (Long Beach)

#### Denver:

Cornelis A. Rietmeijer, MD, MSPH, Principal Investigator

John M. Douglas, Jr., MD, Co-Investigator

Sheana Bull, PhD, MPH, Co-Investigator

Doug Richardson, BS, Study Coordinator

Mark Foster, MA, Data Manager/Analyst

#### San Francisco:

Jeffrey D Klausner, MD, MPH, Principal Investigator

Gregory L. Greenwood, PhD, MPH, Co-Principal Investigator

Carolyn Hunt, MPA, Project Manager

### **3. Methods and Materials**

#### **3.1 Study Design**

3.1a Overview

The goal of this study is to assess the effectiveness of a brief structural waiting room intervention to reduce STD incidence among patients attending STD clinics in the three cities. In this controlled trial, the waiting room condition will be assigned by week to one of two conditions. The intervention waiting room condition will consist of a brief 20-minute educational video focused on preventing STD and HIV infection that will be shown on a large television in the waiting room. Health promotion materials, i.e., posters, will supplement this video. The control waiting room condition will consist of the current standard waiting room experience in each city’s STD clinic, in the absence of the video intervention (see **3.9 Description of intervention and control conditions)**. After the study period, we will retrospectively identify groups of patients exposed to the intervention and control conditions. We will then compare incident rates of STD between the two groups by reviewing existing medical records and STD registry data.

3.1b Assignment of waiting room conditions

We will assign blocks of clinic weeks to either the intervention condition or control condition. This blocking scheme will consist of several identical cycles, each lasting 8 weeks in duration. Each cycle will contain a 4-week control period and a 4-week intervention period. During the first four weeks of each cycle, only one condition (intervention or control) will be administered in the waiting room. During the second four weeks of each cycle, the alternate condition will represent the waiting room condition. The sequence of intervention or control condition will be randomly determined in the first cycle by a coin flip. This sequence will then be maintained throughout the study until the desired time is reached when an adequate number of patients will have been exposed to both conditions (see **Section 3.3 Sample Size**).

3.1c Minimizing contamination of study arms

Through both design and analytic techniques, we will attempt to minimize the possibility that groups exposed to one waiting room condition will be inadvertently exposed to the alternate study condition. (This is more an issue for the control condition than for the intervention condition.) In the design, by administering the waiting room study in 4-week blocks, we will minimize contamination of the control condition; the blocking helps prevent groups that are initially exposed to the control condition and that return to the clinic soon after (e.g., for treatment or follow-up) from being exposed to the intervention condition. In the analysis, we will exclude all group members that have previously been seen in the clinic during the study period (before their first eligible visit) or during the pilot study since groups exposed to the control condition could have been inadvertently exposed to the intervention at another clinic visit. We will also explore how we can use record-based visit data to identify groups who were exposed to the alternate condition *during the study period* and adjust for this during the analysis (e.g., by censoring observation time for all groups at the time of contamination, regardless of their initially assigned waiting room condition).

3.1d Assessment of STD outcomes by waiting room condition

The study will involve passive assessment of STD outcomes for groups exposed to each waiting room condition for a period of at least 6 months, and, on average, 12 months following the initial eligible visit during the study period. New STD diagnoses (i.e., those occurring at least 30 days following the initial eligible visit) will include: gonorrhea, chlamydia, trichomoniasis, syphilis, non-gonococcal urethritis (NGU), mucopurulent cervicitis (MPC), HIV infection, pelvic inflammatory disease (PID), and first episodes of genital herpes and genital warts. Measurement of incident STDs will be conducted retrospectively after the study period through review of individual medical records and local, confidential STD surveillance data and registry records. Draft procedures for conducting record reviews in each clinic can be found in Appendix 1. Incident STD outcomes, as identified through record review, will be compared between groups by their assigned waiting room condition. Comparing the intervention to this control condition will allow us to evaluate the benefit of adding the video-based intervention to currently existing services in the waiting room as a means to prevent new STD and HIV infection. **(See Section 3.4 Data Handling and Analysis** for description of analytic plan**).**

#### **3.2 Data Collection Methods**

No data will be actively collected from patients as part of this study. Data will be abstracted from existing medical records and STD surveillance data and registry records only. Selected variables that are routinely contained in patient records across all sites (e.g., date of birth, sex, visit date, reason for visit, STD diagnosis, reason for visit) will be entered into a data abstraction form either manually or electronically (Appendix 2).

#### **3.3 Sample Size**

The sample size required for this study depends on STD incidence (in the absence of intervention), anticipated effect size of the intervention, power to detect a statistically significant effect, and alpha level (probability of committing Type I error). Based on existing literature for a brief, waiting room video-based intervention (Cohen 1991, Cohen 1992, O’Donnell 1995, O’Donnell 1998), we expect that this waiting room intervention could reduce incident STD by at least 10% compared with the control waiting room condition. Data obtained from the participating sites indicate that an 8% incidence of STD in the control arm would be reasonable to expect under the least stringent definition of STD and that a 5% STD incident would be reasonable to expect under the most stringent definition of STD. (These definitions are described in the footnotes contained in the table below).

Thus, with a conservative 10% reduction in STD from the intervention and an 8% STD incidence, a total sample of 27,630 patients (13,815 per arm) would be required to detect this difference in STD with 80% power and alpha level=0.10. If STD incidence were 5%, a total of 45,550 patients (22,775 per arm) would be needed to detect a 10% reduction in STD. (Note from the table that smaller sample sizes would be needed to achieve 80% power if the effect of the intervention were greater than 10%.) We note that sample sizes may need to be increased to account for the fact that some patients assigned to the intervention arm actually may not receive the full intervention, e.g., because of short wait times in the waiting room. We will use a two-tailed test with alpha=0.05 (total alpha=0.10) to assess statistical significance because the video-based intervention is inexpensive, easily implemented, and not expected to cause harm to patients. The consequences of committing a Type I error in this study are minimal.

Comparison Intervention Absolute Relative Total sample

Percentage percentage % change % change RR size required

8.0%1 7.2% -0.8% 10% .90 27,630

8.0% 6.8% -1.2% 15% .85 12,098

8.0% 6.4% -1.6% 20% .80 6,700

8.0% 6.0% -2.0% 25% .75 4,220

5.0%2 4.5% -0.5% 10% .90 45,550

5.0% 4.25% -0.75% 15% .85 19,920

5.0% 4.0% -1.0% 20% .80 11,022

5.0% 3.75% -1.25% 25% .75 6,936

1 Least stringent definition of incident STD (includes gonorrhea, chlamydia, trichomoniasis, syphilis, non-gonoccocal urethritis (NGU), mucopurulent cervicitis (MPC), HIV, PID, and first episodes of genital herpes and genital warts)

2 More stringent definition of incident STD (includes only gonorrhea, chlamydia, trichomoniasis, syphilis, and HIV)

**3.4   Data Handling and Analysis**

3.4a  *Data Handling*

Data collection will be conducted by retrospective review of existing medical records and intake forms and searches of STD registry data for patients presenting to the STD clinic during the study period.  Each eligible clinic visit during the study period will have one record entry in the database.   Data will be abstracted into a standard abstraction form (Appendix 2) from existing electronic records in all three STD clinics (Denver,San Francisco, Long Beach) . This abstraction form will contain information abstracted from existing medical records, intake forms, and STD case registries.  Sites may also add a few site-specific elements from existing local data.

The data abstraction forms will be maintained locally in an electronic database (e.g., EXCEL) by public health staff involved in the study. These data will be abstracted electronically in sites with electronic medical records and through manual data entry in the site with paper records. In the paper record site, a temporary data set will be created locally for each eligible patient visit that contains personal identifying information and a study identification number, which will be assigned through a computer algorithm. A second locally maintained data set will contain the study identification number and information abstracted from the record (e.g., demographics, reason for visit, visit date, current STD diagnoses) with no personal identifying information. In the two electronic record sites, the study identification number will also be generated by means of a computer algorithm.

At all sites, data analysis and cleaning will first be conducted locally. Data will then be transmitted to CDC with the study identification number and selected other information abstracted from the clinic record; however, no personal identifying information (e.g., name, address) will be transmitted to CDC at any time. The complete data set, including personal identifying information, however, will be maintained locally until all data queries are resolved. Following final data abstraction and cleaning of the local datasets at each site, personal identifying information will be permanently stripped, such that the final analytic dataset will contain only the study identification number and abstracted data that can no longer be linked to individual clinic patients.  At this time, data from all three sites will be aggregated into a central database to be maintained by the Prevention Research Branch, Division of HIV/AIDS Prevention, Centers for Disease Control and Prevention.  During the study, local staff will also periodically send data updates (without personal identifying information) to a central database to be maintained by CDC for consistency checks and development of periodic study reports data to assess overall study progress. On study completion and closeout, the central database will undergo a final cleaning to ensure that all inconsistencies and queries have been resolved before a final analytic dataset is created.

 3.4b  *Data Analysis*

 3.4b(1)  *Assessing comparability of groups*

Initial analyses will be conducted to ensure that groups assigned to the intervention and control waiting room conditions were similar with respect to potential confounding variables (e.g., age, sex, race/ethnicity, sexual orientation, HIV status, STD diagnosis at initial eligible visit).

 3.4b(2) *Outcome measures*

Incident STD outcomes will be evaluated in two different ways according to whether they are confirmed microbiologically. In the primary analysis, only those STDs which can be microbiologically confirmed will be included: gonorrhea, chlamydia, trichomoniasis, syphilis, and HIV infection.  In secondary analyses, we will also include STD syndromes (non-gonococcal urethritis (NGU), mucopurulent cervicitis (MPC), and pelvic inflammatory disease (PID)) and first clinical episodes of viral infections (genital herpes and genital warts).

3.4b(3)  *Analytic plan*

The effectiveness of the intervention will be assessed by comparing STD incidence in groups by their assigned waiting room condition at their initial eligible visit. For this study, an initial eligible visit will be defined as a clinic visit by a patient who is seeking diagnosis, treatment and/or consultation for signs, symptoms, or likely exposure to an STD that has not previously been treated, and who has not been exposed to either waiting room condition in the clinic during the study period. New problem visits occurring more than 30 days after the onset of appropriate treatment for a previously diagnosed STD (regardless of the STD) will also be considered initial eligible visits, if the prior visit was not determined to be a new problem visit.

The individual conducting the database matching of STD outcome data to individual’s eligible patient visits will be blinded from the assigned waiting room condition.  STD incidence will be compared between the groups using combined data from all sites using an intention-to-treat analysis.   Survival analysis will be conducted to assess the association between assigned waiting room condition and time to incident STD.  This time-to-event analysis will be conducted to account for the fact that clinic patients will likely have different lengths of follow-up.  Patient observation time will be censored either at the time of first new infection, the time of first contamination, or at the end of follow-up. Patients who either do not return to the clinic during the study period, or who return to the clinic during the study period but are not diagnosed with an incident STD between 30 days after their first eligible visit and the end of data collection will be assumed not to have new STD for analytic purposes.  New STDs occurring subsequent to censoring (but within the study period) will be recorded for possible additional analyses.  Separate proportional hazard regression models will be developed to compare STD incidence in groups by intervention and control waiting room conditions over time and at specific time periods (e.g., 3, 6 and 12 months). Results will be evaluated for statistical significance using hazard ratios with 90% confidence intervals (alpha=0.10).

#### **3.5 Plans for Reporting Results**

Upon completion of data analyses, the principal results will be written up for publication in a peer reviewed scientific journal. Additional papers will also be written and submitted to peer-reviewed scientific journals as appropriate. Oral presentations at scientific conferences and at seminars within the CDC and the study sites will also be encouraged. CDC and participating sites will inform relevant parties within and outside of CDC of the study results, so that they may be taken into consideration when developing or modifying prevention programs or policy.

An authors’ committee will be established, comprising representatives from each site and the CDC. All proposals for publications or presentations arising from this study will be reviewed by the authors’ committee. All investigators will be required to sign an authors’ agreement to ensure that study results are not reported without approval from the authors’ committee. Reports with CDC authors must be cleared by CDC before publication.

#### **3.6 Clinical Procedures**

No clinic procedures are involved in this study beyond the usual services provided by STD clinics.

**3.7 Analytic Techniques**

Not applicable

**3.8 FDA IND Information**

Not applicable

**3.9** **Description of intervention and control conditions**

3.9a *Intervention condition*

The intervention waiting room condition will consist of a brief, educational 20-minute video (supplemented by posters and video rating cards) that is similar to those used in previous studies (O’Donnell 1995, Cohen 1992) and similar to videos currently being disseminated by federal agencies (such as CDC) to comparable populations. The video will be played on a television for all patients in the clinic waiting room during the assigned dates of the intervention condition and will be appropriate for patients as well as those who may accompany them to the clinic. We are concurrently submitting a copy of the video (along with a hard copy of the protocol) as part of this IRB submission. Posters will consist of one or more stills from the educational video and will contain wording directing attention to the video or reinforcing key messages imparted by the video. The posters will be placed both in the waiting room and in the exam rooms. Video cards (on 4” x 6” note cards) promoting attention to the educational video-based intervention will also be strategically placed in the waiting room following pilot testing. An example of the video card that might be used can be found in Appendix 3. All intervention materials (video, posters, and rating cards) will be reviewed and approved by the program review panel in each site before the beginning of the study.

On intervention days, the video will be shown at established time intervals that are most appropriate to the average time spent by patients in the waiting room and the number of eligible persons seen at each clinic per day. Given the current range of wait times in each of the clinic sites, we estimate that the frequency of presentation will range from one to three times an hour. Understanding the variability of waiting room experiences among patients, it is possible that some patients in the waiting room may view the video more than once while other patients will see the video only partially. To increase the likelihood that as many patients in the STD clinic waiting room as possible are exposed to the video at least once and pay attention to the video, the best time intervals will be selected after pilot data has been collected from each clinic. A protocol to conduct this pilot study was approved by the CDC IRB on 1/14/02. Our target goal for the pilot study is that at least 80% of patients in each site both will be exposed to the video and recall such exposure to the video.

3.9b *Control condition*

The control condition will consist of the current standard waiting room experience of STD clinic attendees in each participating site, in the absence of the video-based intervention. This condition may vary by site and could include the showing of television or videos. Study staff will routinely document the waiting room conditions for both the intervention and control arms (e.g., to assess difficulties administering the video intervention and note the presence of other interventions).

### **4. Participants**

#### **4.1 Selection Procedures**

Participants will not be actively recruited for this study. Retrospective record reviews will be conducted for all patients who attend one of the 3 participating STD clinics with a new problem visit during the study period. No special measures will be taken to oversample the record abstraction by sex, age, sexual orientation, race-ethnicity, site, or other factors.

#### **4.2 Vulnerable Populations**

In all three sites, records for groups of patients visiting the STD clinic waiting room during the study period will be retrospectively reviewed for new STD diagnoses according to their waiting room condition. Because this is a record review, the study will not involve prisoners or other special populations as a target population.

#### **Emergency Care Procedures**

While no adverse physical consequences are anticipated to be related to watching the educational video, in the event of a medical emergency, usual clinic emergency procedures will be followed.

**4.4 Handling and Reporting of Adverse Events**

No adverse consequences are anticipated from this study. In the event of a medical emergency, standard operating procedures for each clinic will be followed. Sites will report adverse events related to the study immediately to CDC.

#### **4.5 Procedures for Notifying Participants of their Results**

Not applicable.

**5. Risk/Benefit Information**

#### **5.1 Description of Risks and Methods to Minimize Risks in this Study**

This study poses minimal risk to STD clinic patients since it involves review of existing medical records and STD surveillance data and registry records and involves no direct contact with patients. This study will not interfere with any ongoing services at the clinic sites. Strict procedures maintain confidentiality will be followed, as is the policy in STD clinics (also see Section 7.2 **Methods to Protect Confidentiality)**. All study-related hard copy materials will be stored in locked file cabinets in locked researchers’offices. All study-related electronic files will be stored on the study coordinators’ computers as password-protected files in password-protected folders. All patient identifiers (name, street address, phone number and medical record number) will be removed before individual level data are transmitted to CDC. Any publications or presentations resulting from this project will not use any personally identifying information that could be linked to a specific individual.

#### **5.2 Direct Benefits to Participants Associated with this Study**

Because of its nature (record review), there are minimal direct benefits to groups of patients assessed in this study.

**5.3 Description of the potential risk to anticipated benefit ratio.**

The risks and benefits to participants associated with this study are both small. The study could benefit STD clinic patients in general if the intervention is demonstrated to be effective at reducing STD incidence.

### **6. Informed Consent**

This research protocol consists of a retrospective review of existing records and will not involve prisoners or other special populations (i.e., pregnant women) as a target population. The study does involve human subjects, and as such, requires review and approval by the CDC IRB. As part of the approval process, we request that a waiver of informed consent be granted by the IRB. Under 45 CFR 46.116(d) (“General requirements for informed consent”), the study meets the four criteria addressed below.

*(1) The study involves no more than minimal risk to subjects.*

Data collection will be conducted by retrospective review of existing medical records and intake forms and searches of STD registry data in patients presenting to the STD clinic. These records and forms are routinely completed, maintained, and reviewed at the study site by public health staff. Data will be abstracted from electronic records in all three STD clinic(Denver,San Francisco, Long Beach). Neither patient interviews nor any other activities requiring direct contact with the patients will occur for the purpose of the study.

A temporary data set will be created at the local level that contains personal identifying information, a study identification number, and information abstracted from the medical record. Following final data abstraction and cleaning of the dataset, personal identifying information will then be permanently stripped from this data set, such that the final analytic dataset will contain only the study identification number and abstracted data that can no longer be linked to individual clinic patients. Confidentiality safeguards of all study records will be implemented, as is common practice for medical records and STD registry data. Study databases used for record reviews will only be accessible to survey staff and are locked in secured file cabinets after working hours. All data files existing on survey computer equipment are password-protected and are only accessible to study data managers.

*(2) The waiver or alteration will not adversely affect the rights and welfare of the subjects.*

Only information that is routinely collected during the clinic’s intake process or clinic visit will be abstracted for analysis. Under no circumstances will this study affect the STD clinic services, care or other privileges provided to patients.

*(3) The study could not practicably be carried out without the waiver or alteration.*

Requiring individual consent for the review and abstraction of existing medical records and STD surveillance registry records for >25,000 patients would present severe logistical difficulties for all sites and would preclude completion of this study in a reasonable time frame given available resources.From a methodologic standpoint, requiring individual consent for review of existing records would likely result in an unpredictable level of non‑consent and epidemiologic bias which will limit the validity of our findings.

*(4) Whenever appropriate, the subjects will be provided with additional pertinent information after participation.*

Information from the study (e.g., results of the comparison of STD incidence between intervention and control arms) will be provided to the facility staff, the local and state health department, and HIV community planning groups. The study results will provide local prevention programs valuable information about the effectiveness of brief interventions that can be easily implemented in STD clinic waiting rooms.

In conjunction with this request for a waiver of informed consent, we also request a Waiver of Authorization for Disclosure of Public Health Information (PHI) under 45 CFR 164.506 under the Privacy Rule of the Health Insurance Portability and Accountability Act (HIPAA) of 1996 (see MMWR 2003) for the purposes of conducting health research.

Under 45 CFR 164.512 (i), the proposed study meets each of the three criteria that must be satisfied for a Waiver of Authorization for Disclosure of Protected Health Information under the Privacy Rule:

*(1) the use or disclosure of protected health information (PHI) involves no more than a minimal risk to the privacy of individuals, based on the presence of the following elements:*

*a. an adequate plan to protect identifiers from improper use and disclosure*

b. an adequate plan to destroy the identifiers at the earliest opportunity consistent with the conduct of the research; and

*c. adequate written assurances that the protected health information will not be reused or disclosed to any other person or entity.*

The use or disclosure of PHI will involve no more than a minimal risk of privacy to individuals. Each site will have a plan in place to protect identifiers from improper use and disclosure. Medical chart data will be abstracted from existing electronic databases , a study identification number will be assigned to each eligible record. Computerized algorithms will then be run only on these existing databases to obtain the information needed for this analysis (see Appendix 2). No personally identifying information will be reported or separately abstracted outside of these databases. The final analytic data set for these two sites will thus contain only the assigned study identification number and information abstracted from the medical record and no personally identifying information. Following cleaning of the final data set, the initial link between the assigned study identification number and any identifying information will be destroyed. Confidentiality safeguards of all databases will be implemented, as is common practice for medical records and STD registry data in these sites. Existing databases used for record reviews will only be accessible to survey staff and are locked in secured file cabinets after working hours. All data files existing on survey computer equipment are password-protected and are only accessible to study data managers.

Protected health information abstracted from existing medical records will be accessible only to study-related staff and used only for this study. Protected health information obtained for the purpose of this study will not be reused or disclosed to any other persons or entity, as is the standard practice in the STD clinics in which the study will operate. Additional safeguards will be in place to help prevent accidental disclosure of protected health information: access to computerized files will be password-protected and computers will be locked up when not in use. All reports or publications originating from this study will contain aggregate information and will not contain any identifying information that could be linked to a certain individual.

*(2) the research could not practicably be conducted without the waiver;*

As noted above, obtaining individual authorization for the review and abstraction of existing medical records and STD surveillance registry records for >25,000 patients would present severe logistical difficulties for all sites and would preclude completion of this study in a reasonable time frame given available resources. From a methodologic standpoint, requiring individual authorization for retrospective review of records could result in self-selection and epidemiologic bias that would limit the validity of our findings.

*(3) the research could not be practicably be conducted without access to and use of the PHI*

Access to and use of certain protected health information is essential for this retrospective review of existing medical records. Without access to information such as patient name, date of birth, and clinic visit date, it would not be possible to conduct this research to assess the effectiveness of the video-based educational intervention. This information is necessary to enable researchers to document incident STD diagnoses from medical records and STD surveillance data and registry records. Additionally, information on clinic visit date is necessary to document whether patients received either the intervention or control condition while in the STD clinic waiting room.

### **7. Records Management**

#### **7.1 Description of forms to be used (see forms and questionnaires in Appendix)**

A data abstraction form will be completed from existing medical records (Appendix 2).

There will be data checks for completeness and consistency. Data management is the responsibility of all sites.

#### **7.2 Methods to Protect Confidentiality**

Study databases used for record reviews will only be accessible to clinic staff involved with the study and are locked in secured file cabinets after working hours. All data files existing on surveillance computer equipment are password-protected and are only accessible to clinic staff involved with the study. As noted in **Section 6: Informed Consent,** personal identifying information will be permanently stripped before the final analytic dataset is transmitted to CDC so that the study identification number and abstracted data can no longer be linked to individual clinic patients.

#### **7.3 Justification for Collection of Sensitive Information**

Sensitive information is routinely collected in STD clinics. No additional sensitive information will be collected as part of this protocol.

References

Cates W Jr, ASHA Panel. Estimates of the incidence and prevalence of sexually transmitted diseases in the United States. Sex Transm Dis 1999;26(suppl 4):S2-S7.

Cohen D, MacKinnon D, Dent C, et al. Group counseling at STD clinics to promote use of condoms. Public Health Reports 1992;107:727-31.

Cohen D, Dent C, Mackinnon. Condom skills education and sexually transmitted disease reinfection. J Sex Research 1991;28:139-44.

Cohen D, Dent C, Mackinnon D, et al. Condoms for men, not women: results of brief promotion programs. Sex Transm Dis 1992;19:245-51.

Kamb ML, Fishbein M, Douglas JM, et al. Efficacy of risk-reduction counseling to prevent human immunodeficiency virus and sexual transmitted diseases. *JAMA* 1998;280:1161-67.

CDC. HIPAA Privacy Rule and public health: guidance from CDC and the U.S. Department of Health and Human Services. MMWR 2003;52(Early Release):

O’Donnell CR, O’Donnell L, San Doval A, et al. Reductions in STD infections subsequent to an STD clinic visit: using video-based patient education to supplement provider interactions. Sex Transm Dis 1998;25:161-8.

O’Donnell L, San Doval A, Duran R. The effectiveness of video-based interventions in promoting condom acquisition among STD clinic patients. Sex Transm Dis 1995;22:97-103.

**List of Appendices**

Appendix 1 Clinic-specific procedures for conducting reviews of medical records, STD surveillance databases, and registry records

Appendix 2 Abstraction form

Appendix 3 Example of video rating card

Appendix 1 Draft clinic-specific procedures for conducting reviews of medical

Records and STD surveillance registry records

***Denver site***

Patients visiting the Denver STD clinic for the first time are routinely assigned a clinic ID number. Various personal and demographic information, including date of birth, are collected and stored in the clinic’s computer database. Subsequent patient visits, whether they are scheduled follow-up visits, or unique, new visits, are recorded accordingly and stored. Data analysis for the study will involve reviewing the clinic database, using clinic ID numbers and date of birth as identifiers, to identify patients who have made a second unique, new clinic visit (not a scheduled follow-up), at least 30 days after the initial visit indicating a possible new incident STD. Patient records with unique, new visits will be further screened for specific STD diagnoses and whether their initial visit to the clinic occurred on a day when the video was being shown in the waiting room.

It is likely that some patients, after making an initial visit to the Denver STD clinic for treatment, will make subsequent unique, new visits to other health care providers in county of Denver for treatment of a new STD. The Colorado Department of Public Health and Environment (CDPHE) maintains a registry of individuals reported by local physicians and laboratories who were diagnosed with gonorrhea, chlamydia, syphilis, and HIV. In order to account for these patients, a retrospective analysis of individuals in CDPHE STD registry for Denver county will be conducted and compared to the Denver STD clinic database of patients with a previous initial clinic visit. Individuals will be matched on the basis of date of birth and first and last name by means of a soundex code, and it will be noted whether the video was playing on the date of their initial clinic visit.

***San Francisco site***

At initial intake, San Francisco City Clinic patients complete a registration process that records name, date of birth, age, gender, contact information, race, sexual orientation, education, income, and reason for visit. These data are maintained in a database and updated at each subsequent visit. The data base, ISCHTAR, also contains information on cases reported for all reportable STDs (gonorrhea, chlamydia, syphilis) from laboratory tests from private physicians, clinics and hospitals, and generates a unique identification number for each case report. This unique number links the patient’s clinic record with the reporting data and makes it possible to know if any clinic patient tests positive for an STD. Information on reported STDs reaches ISCHTAR within 8 weeks from diagnosis.

A field will be created in the clinic patient’s record indicating the waiting room condition on a given clinic visit day. ISCHTAR will be reviewed, using the unique identifier, for those eligible for the study and whether they made an initial visit to the clinic on an intervention or control day. We will search the database for diagnoses indicating a possible new incident STD at least 30 days after the initial visit.

***Long Beach Site***

# All patients visiting the Long Beach Department of Health and Human Services Preventive Health (STD) Clinic complete a registration process and are assigned a medical record (identification) number. Various personal and demographic information, including date of birth, and reason for visit and STD diagnosis (if any) are abstracted onto a clinic record abstract form and entered and stored in the clinic’s computer database.  Subsequent patient visits, whether they are scheduled follow-up visits, or unique, new visits, are recorded accordingly and stored.  Data analysis for the study will involve reviewing the clinic database, using clinic ID numbers and date of birth as identifiers, to identify patients who have made a second unique, new clinic visit (not a scheduled follow-up), at least 30 days after the initial visit indicating a possible new incident STD.  Patient records with unique, new visits will be further screened for specific STD diagnoses and whether their initial visit to the clinic occurred on a day when the video was being shown in the waiting room.

It is likely that some patients, after making an initial visit to the Long Beach STD clinic for treatment, will make subsequent unique, new visits to other health care providers in the local area for treatment of a new STD.  Surveillance data transmitted to the LBDHHS on reportable STDs will also be linked to clinic record data to determine if new STDs have been diagnosed at a site other than the Preventive Health Clinic. All of these data are routinely available to the LBDHHS Preventive Health Bureau data management staff who will link the data and provide data with no identifiers to the study investigators who are not LBDHHS staff. Individuals will be matched on the basis of date of birth and first and last name, and it will be noted whether the video was playing on the date of their initial clinic visit.

Appendix 2: Draft data abstraction form

# DATA ABSTRACTION FORM

1. **Site #** ___
2. **Study Condition**  intervention  control

**3. Patient Study ID #** ___ ___ ___ ___

**4. Date of Birth** __ __/__ __/__ __

day mo yr

**5. Sex**   Male  Female

6. **Ethnicity**  Hispanic or Latino  Not Hispanic or Latino

7. **Race**  African American or black

 American Indian or Alaska Native

 Asian

 Native American or Other Pacific Islander

 White

8. **Clinic Visit Date** ___ ___/ ___ ___/___ ___

day mo yr

9. **Reason for Visit**  Symptoms  Contact  Other_________________

10. **Sexual History** In last _____ months:

Number of Partners _____ total [ ____ males/ _____ females]

 Yes  No Oral Sex (receives/performs)

 Yes  No Vaginal Sex

 Yes  No Anal Sex (receives/performs)

11. **STD Diagnosis from initial intake visit:**

Yes No

Gonorrhea  

Chalmydia  

Trichomoniasis  

Syphilis  

NGU  

MPC  

HIV  

PID  

Herpes (first episode)  

Genital Warts (first episode)  

Other  _________

None 

12. STD Diagnosis from subsequent clinic visit:

Yes No If Yes, date of most recent diagnosis:

Gonorrhea  

Chalmydia  

Trichomoniasis  

Syphilis  

NGU  

MPC  

HIV  

PID  

Herpes (first episode)  

Genital Warts (first episode)  

Other  _________

None 

Appendix 3: Example of video rating card

Now Playing:

Safe in the City

Today we are previewing our new educational video, “Safe in the City,” in our clinic waiting room. We want to hear from you what you think of our video!! Please fill out this card and drop it off in the drop-box after you have a chance to see the video or on your way out. Thanks!

Your comments:

[Name of university/research institution/health department]
